# Supplementary material for: Living cell-based ultrahigh-supercapacitive behaviours
Source: Royal Society of Chemistry journal article supplement (doi:10.1039/d1ta09818g), 2021-12-07
Supplement: d1ta09818g1.pdf [file d1ta09818g1.pdf]

## Supporting Information

### Living cell-based ultrahigh-supercapacitive behaviors

Xiaoshuai Wu<sup>a†</sup>, Jing Liu<sup>b†</sup>, Chun Xian Guo<sup>a†</sup>, Zhuanzhuan Shi<sup>a</sup>, Zhuo Zou<sup>a</sup>, Wei Sun<sup>d</sup>, Chang Ming Li<sup>a, c \*</sup>

a. Institute of Materials Science & Devices, School of Materials Science and Engineering, Suzhou University of Science and Technology, Su Zhou, Jiangsu 215009, P.R. China.

b. School of Chemical and Biomedical Engineering & Center for Advanced Bionanosystems, Nanyang Technological University, 70 Nanyang Drive, Singapore 637457, Singapore.

c. Institute for Advanced Cross-field Science and College of Life Science, Qingdao University, Qingdao 266071, P.R. China.

d. College of Chemistry and Chemical Engineering, Hainan Normal University, Haikou 571158, P R China

† These authors contribute equally to this work.

\*Correspondence to: Chang Ming Li, Correspondence and requests for materials should be addressed to C.M. Li (Email: [ecmli@usts.edu.cn](mailto:ecmli@usts.edu.cn), [ecmli@swu.edu.cn](mailto:ecmli@swu.edu.cn)).

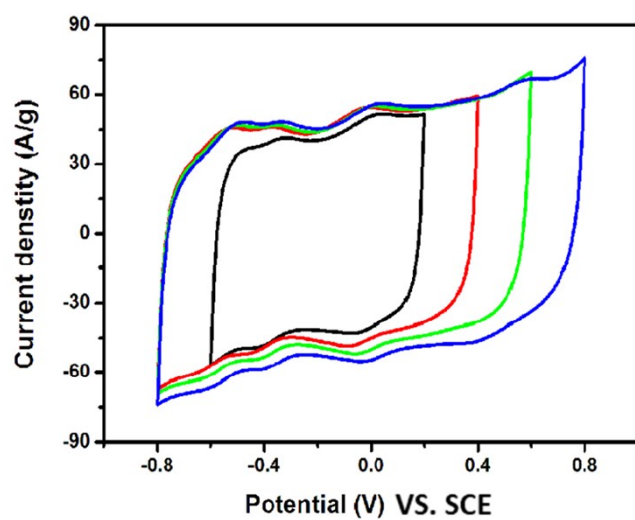

**Figure S1.** CVs of bio-supercapacitor constructed with *P. aeruginosa* biofilm grown on graphene coated carbon cloth electrodes in various electrochemical windows. The scan rate is 50 mV/s.

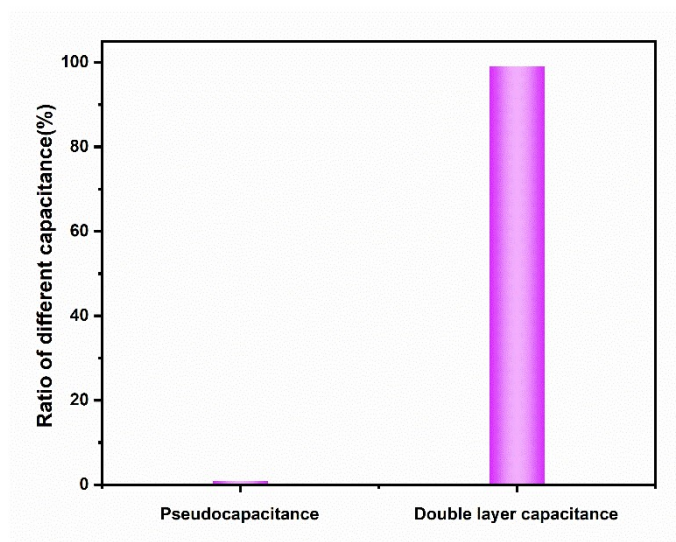

**Figure S2.** The ratio of pseudocapacitance and double layer capacitance of the living cell-based supercapacitors.

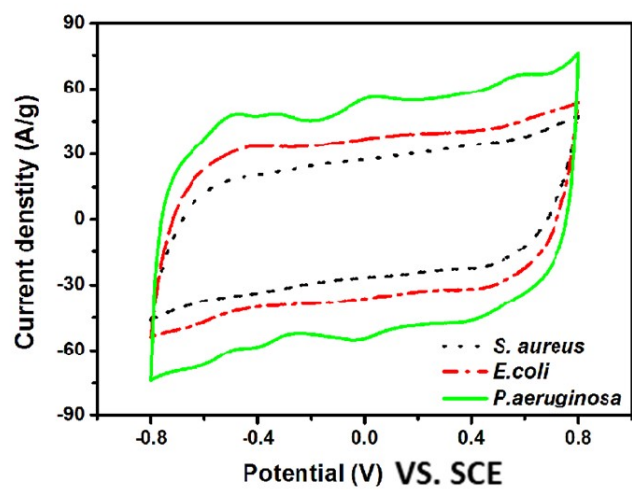

**Figure S3.** CVs of bio-supercapacitors constructed with *S. aureus*, *E. coli* and *P. aeruginosa*.
